# Supplementary material for: Research Integrity in Guidelines and evIDence synthesis (RIGID): a framework for assessing research integrity in guideline development and evidence synthesis
Source: PubMed Central journal article supplement — eClinicalMedicine. 2024 Jul 16;74:102717. doi: 10.1016/j.eclinm.2024.102717 (PMC11612463; doi:10.1016/j.eclinm.2024.102717), 2024-07-16
Supplement: mmc2.pdf [file mmc2.pdf]

| <i>DOMAIN</i>                      | <i>Checklist Item</i> | <i>Interpretation</i>                                                                                                                                                                                           |
|------------------------------------|-----------------------|-----------------------------------------------------------------------------------------------------------------------------------------------------------------------------------------------------------------|
| Governance                         | 1a                    | Absent or retrospective registration of RCTs. This is relevant for RCTs commencing after 2010                                                                                                                   |
|                                    | 1b                    | Discrepancy of >15% between the intended sample size in the trial registration compared to the actual sample size achieved in the RCT <sup>1</sup>                                                              |
|                                    | 1c                    | Absent or vague description of research ethics or apparent concerns regarding ethics <sup>2</sup>                                                                                                               |
| Author Group <sup>3</sup>          | 2a                    | Number of authors $\leq 3$ or low author to study size ratio                                                                                                                                                    |
|                                    | 2b                    | Other studies of authors have been retracted not on request of the authors <sup>4</sup>                                                                                                                         |
|                                    | 2c                    | Large number of RCTs published in a short time frame by one author/in one institute <sup>5</sup>                                                                                                                |
| Plausibility of Intervention Usage | 3a                    | Insufficient or implausible description of allocation concealment (e.g. two interventions but only one placebo) <sup>6</sup>                                                                                    |
|                                    | 3b                    | Unnecessary or illogical description of methodological standards (e.g. use of sealed envelopes in a placebo-controlled trial)                                                                                   |
| Timeframe                          | 4a                    | Fast recruitment of participants within the study time (especially single centre studies)                                                                                                                       |
|                                    | 4b                    | Short or impossible time frame between ending recruitment/follow up and submission of the paper (take into account time to outcome e.g. live birth, pregnancy outcome etc.) <sup>7</sup>                        |
| Drop-Out Rates                     | 5a                    | Zero participants lost to follow up or no reasons mentioned for loss of follow up <sup>8</sup>                                                                                                                  |
|                                    | 5b                    | Ideal number of losses to follow up resulting in perfectly rounded number in each group (e.g. groups of 50 or 100)                                                                                              |
| Baseline Characteristics           | 6a                    | No or few baseline (<5) characteristics presented                                                                                                                                                               |
|                                    | 6b                    | Implausible patient characteristics judging from common sense, the literature and local data (e.g. similar standard deviations for completely different characteristics with different means and distributions) |
|                                    | 6c                    | Perfect balance for multiple baseline characteristics or significant/large differences between baseline characteristics                                                                                         |
|                                    |                       | Important prognostic factors are not reported as baseline characteristics                                                                                                                                       |
| Outcomes                           | 7a                    | Effect size that is much larger than in other RCTs regarding the same topic <sup>9</sup>                                                                                                                        |
|                                    | 7b                    | Conflicting information between outcomes (e.g. more ongoing pregnancies than clinical pregnancies)                                                                                                              |
|                                    |                       | Change in primary outcome from registration to publication                                                                                                                                                      |

**Reference:**

[1] Mol BW, Lai S, Rahim A, et al. Checklist to assess Trustworthiness in RAndomised Controlled Trials (TRACT checklist): concept proposal and pilot. Res Integr Peer Rev 2023; 8(1): 6.

<sup>1</sup>If registration is retrospective, then by definition the RCT sample size will be the same as the registered number

<sup>2</sup>Obtaining proof of ethics approval (or similar) may be useful to guide the rating of this item

<sup>3</sup>Consider using publisher services such as Scopus or Clarivate to identify authors and their publications

<sup>4</sup>Consider checking <http://retractiondatabase.org/RetractionSearch.aspx>

<sup>5</sup>This 'number' is subjective based on the field of study, author or author group, number of recruitment centres, and timeframe

<sup>6</sup>Consider if the interventions and control/placebo are explained sufficiently enough to be repeated in another experiment

<sup>7</sup>The recruitment time frame is from the date of the first recruited patient to the date of the last recruited patient

<sup>8</sup>Especially in cases of long follow up (e.g. multiple months) and/or multiple cycles of or long-lasting interventions

<sup>9</sup>Consider utilising meta-analyses if available
